# Supplementary material for: New colorimetric and fluorometric sensing strategy based on the anisotropic growth of histidine-mediated synthesis of gold nanoclusters for iodide-specific detection
Source: Royal Society of Chemistry journal article supplement (doi:10.1039/c2an36462j), 2013-01-01
Supplement: c2an36462j.pdf [file c2an36462j.pdf]

Supplementary material (ESI) for Analyst  
This journal is © The Royal Society of Chemistry 2012

## Electronic Supporting Information

*for*

### **New colorimetric and fluorometric sensing strategy based on the anisotropic growth of histidine-mediated synthesis of gold nanoclusters for iodide-specific detection**

Yifeng Wang,<sup>c</sup> Haiyan Zhu,<sup>c</sup> Xiaoming Yang,<sup>ab</sup> Yao Dou,<sup>b</sup> and Zhongde Liu<sup>\*ab</sup>

<sup>a</sup>Education Ministry Key Laboratory on Luminescence and Real-Time Analysis, Southwest University; <sup>b</sup>College of Pharmaceutical Science, Southwest University; <sup>c</sup>Key Laboratory of Eco-environments in the Three Gorges Reservoir Region (Ministry of Education), Faculty of Life Science, Southwest University, Chongqing 400715, China.

#### **Figures**

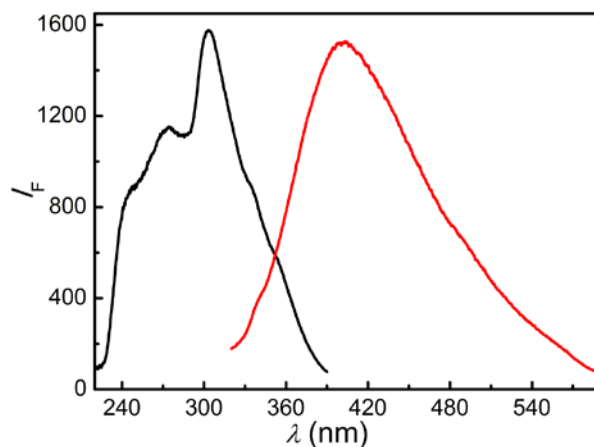

**Figure S1** The excitation and emission spectra of the AuNCs@His solution.

Supplementary material (ESI) for Analyst  
This journal is © The Royal Society of Chemistry 2012

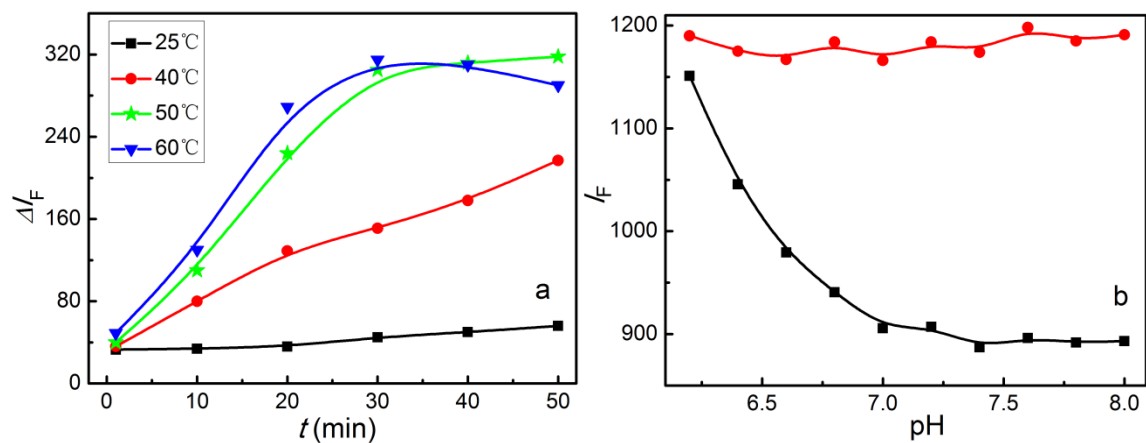

**Figure S2** (a) The impact of reaction temperature and time on the fluorescence of the AuNCs@His in the presence of 20  $\mu\text{M}$  iodide, and (b) the effect of pH on the fluorescence intensity of the AuNCs@His solution in the absence (red) and the presence (black) of 20  $\mu\text{M}$  iodide. All data were collected at 418.0 nm.
